# Supplementary material for: RETRACTED: Fluorinated Analogs of Organosulfur Compounds from Garlic (Allium sativum): Synthesis, Chemistry and Anti-Angiogenesis and Antithrombotic Studies
Source: MDPI journal article supplement (doi:10.3390/molecules22122081), 2017-11-28

## Supplementary Materials

### Fluorinated analogs of organosulfur compounds from garlic (*Allium sativum*). Synthesis, chemistry and anti-angiogenesis and antithrombotic studies

Eric Block, Benjamin Bechand, Sivaji Gundala, Abith Vattekkatte, Kai Wang, Shaymaa S. Mousa, Kavitha Godugu, Murat Yalcin, and Shaker A. Mousa

#### TABLE OF CONTENTS

|                                                                                                                                                      |    |
|------------------------------------------------------------------------------------------------------------------------------------------------------|----|
| <b>Table S1.</b> Crystal data and structure refinement for <b>13</b> .....                                                                           | 2  |
| Ultra-performance liquid chromatography silver coordination ion spray mass spectrometry of bis(2-fluoroallyl) polysulfane mixture ( <b>21</b> )..... | 3  |
| <b>Table S2.</b> UPLC-(Ag <sup>+</sup> )-CIS-MS Analysis of Bis(2-fluoro-2-propenyl) Polysulfanes ( <b>21</b> )...                                   | 4  |
| <sup>1</sup> H NMR spectra .....                                                                                                                     | 7  |
| S-(2-Fluoroallyl) ethanethioate ( <b>11</b> ).....                                                                                                   | 7  |
| 1,2-Bis(2-fluoroallyl)disulfane ( <b>12</b> ).....                                                                                                   | 8  |
| S-2 -Fluoro-2-propenyl-L-cysteine ( <b>13</b> ).....                                                                                                 | 9  |
| <sup>13</sup> C NMR Spectra .....                                                                                                                    | 10 |
| Difluoroallicin ( <b>9</b> ; S-(2-Fluoroallyl) 2-fluoroprop-2-ene-1-sulfinothioate).....                                                             | 10 |
| S-(2-Fluoroallyl) ethanethioate ( <b>11</b> ).....                                                                                                   | 11 |
| 1,2-Bis(2-fluoroallyl)disulfane ( <b>12</b> ).....                                                                                                   | 12 |
| S-2 -Fluoro-2-propenyl-L-cysteine ( <b>13</b> ).....                                                                                                 | 13 |
| <sup>19</sup> F NMR Spectra .....                                                                                                                    | 14 |
| Difluoroallicin ( <b>9</b> ; S-(2-Fluoroallyl) 2-fluoroprop-2-ene-1-sulfinothioate).....                                                             | 14 |
| S-(2-Fluoroallyl) ethanethioate ( <b>11</b> ).....                                                                                                   | 15 |
| 1,2-Bis(2-fluoroallyl)disulfane ( <b>12</b> ).....                                                                                                   | 16 |
| Mixture of difluoroallicin, <b>9</b> , and trifluoroajoene, <b>16</b> .....                                                                          | 17 |
| Mixture of difluoroallicin, <b>9</b> , and trifluoroajoene, <b>16</b> .....                                                                          | 18 |
| S-2 -Fluoro-2-propenyl-L-cysteine ( <b>13</b> ) (fluorodeoxyalliin).....                                                                             | 19 |
| (+)-S-2-Fluoro-2-propenyl-L-cysteine S-oxide ( <b>22</b> ).....                                                                                      | 20 |
| DART Mass Spectra.....                                                                                                                               | 21 |

**Table S1.** Crystal data and structure refinement for **13**.

| Compound                                                                       | str949                                            |
|--------------------------------------------------------------------------------|---------------------------------------------------|
| Empirical formula                                                              | C <sub>6</sub> H <sub>10</sub> FNO <sub>2</sub> S |
| Formula weight                                                                 | 179.21                                            |
| Temperature (K)                                                                | 100(2)                                            |
| Wavelength (Å)                                                                 | 0.71073                                           |
| Crystal system                                                                 | Monoclinic                                        |
| Space group                                                                    | <i>P</i> 2 <sub>1</sub>                           |
| <i>a</i> (Å)                                                                   | 9.343(3)                                          |
| <i>b</i> (Å)                                                                   | 5.2055(17)                                        |
| <i>c</i> (Å)                                                                   | 16.632(6)                                         |
| $\alpha$ (°)                                                                   | 90.00                                             |
| $\beta$ (°)                                                                    | 92.240(5)                                         |
| $\gamma$ (°)                                                                   | 90.00                                             |
| <i>V</i> (Å <sup>3</sup> )                                                     | 808.3(5)                                          |
| <i>Z</i>                                                                       | 4                                                 |
| $\rho_{\text{calcd}}$ (g·cm <sup>-3</sup> )                                    | 1.473                                             |
| $\mu$ (mm <sup>-1</sup> )                                                      | 0.368                                             |
| <i>F</i> (000)                                                                 | 376                                               |
| Crystal size (mm)                                                              | 0.12×0.08×0.02                                    |
| $\vartheta$ range for data collection (°)                                      | 2.18-27.04                                        |
| Reflections collected                                                          | 6653                                              |
| Independent reflections                                                        | 3453                                              |
|                                                                                | [ <i>R</i> <sub>int</sub> = 0.0370]               |
| Transmission factors<br>(min/max)                                              | 0.9642/1                                          |
| Data/restraints/params.                                                        | 3453/1/199                                        |
| Flack <i>x</i> parameter                                                       | -0.01(8)                                          |
| <i>R</i> 1, <sup>a</sup> <i>wR</i> 2 <sup>b</sup> ( <i>I</i> > 2σ( <i>I</i> )) | 0.0497, 0.1012                                    |
| <i>R</i> 1, <sup>a</sup> <i>wR</i> 2 <sup>b</sup> (all data)                   | 0.0701, 0.1111                                    |
| Quality-of-fit <sup>c</sup>                                                    | 0.982                                             |

<sup>a</sup> $R1 = \sum ||F_o| - |F_c|| / \sum |F_o|$ . <sup>b</sup> $wR2 = [\sum [w(F_o^2 - F_c^2)^2] / \sum [w(F_o^2)^2]]$ .

<sup>c</sup>Quality-of-fit =  $[\sum [w(F_o^2 - F_c^2)^2] / (N_{\text{obs}} - N_{\text{params}})]^{1/2}$ , based on all data.

Ultra-performance liquid chromatography silver coordination ion spray mass spectrometry of bis(2-fluoroallyl) polysulfane mixture (21)

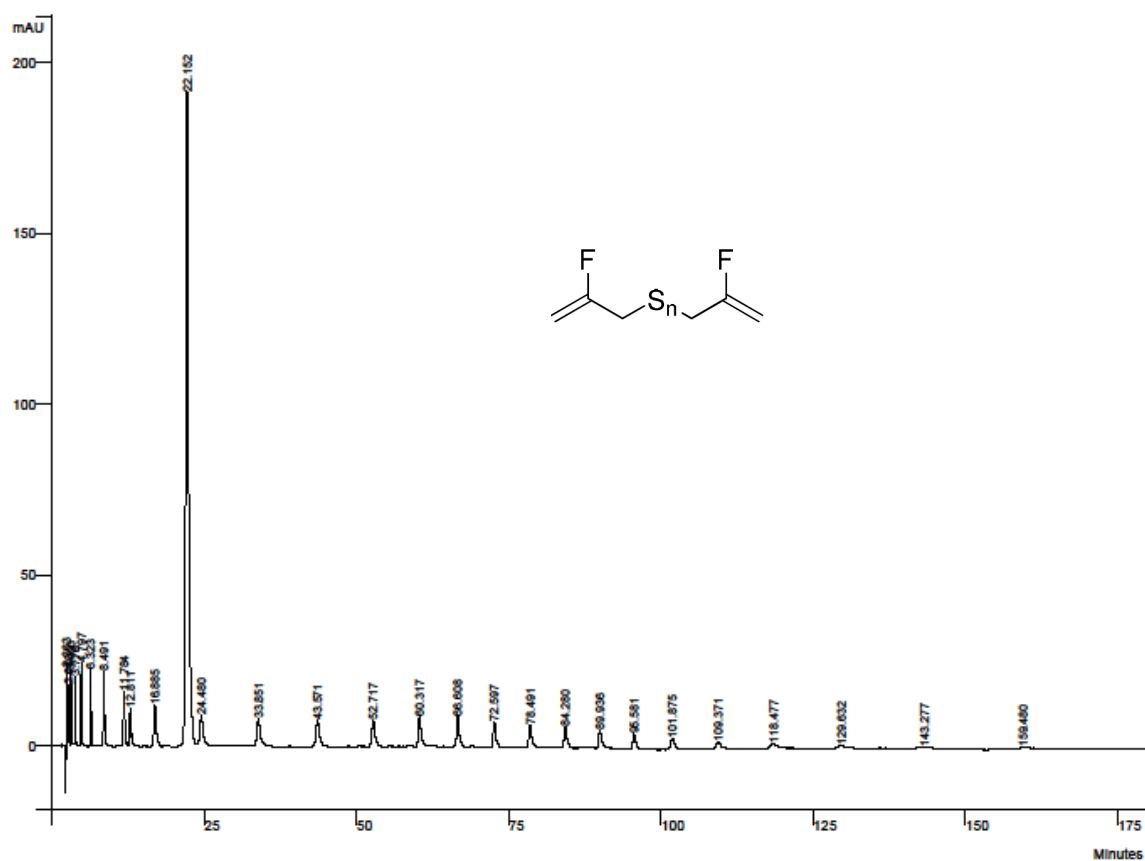

**Table S2. UPLC-(Ag<sup>+</sup>)-CIS-MS Analysis of Bis(2-fluoro-2-propenyl) Polysulfanes (21)**

|                                                                         |           |                   |             |    |
|-------------------------------------------------------------------------|-----------|-------------------|-------------|----|
| Calcd smallest parent mass (exact): 352.853 Da                          |           | Found: 352.802 Da |             | S4 |
| Mass of tallest peak: 355 Da [3.53 min]                                 |           |                   |             |    |
| Formula: C <sub>6</sub> H <sub>8</sub> F <sub>2</sub> S <sub>4</sub> Ag |           |                   |             |    |
| m/z                                                                     | %, calcd. | m/z measured      | %, measured |    |
| 353                                                                     | 89.7      | 352.8             | 95.3        |    |
| 355                                                                     | 100       | 354.79            | 100         |    |
| 357                                                                     | 16.7      | 356.87            | 14.7        |    |
|                                                                         |           |                   |             |    |
| Calcd smallest parent mass (exact): 384.825 Da                          |           | Found: 384.820 Da |             | S5 |
| Mass of tallest peak: 387 Da [4.55 min]                                 |           |                   |             |    |
| Formula: C <sub>6</sub> H <sub>8</sub> F <sub>2</sub> S <sub>5</sub> Ag |           |                   |             |    |
| m/z                                                                     | %, calcd. | m/z measured      | %, measured |    |
| 385                                                                     | 86.2      | 384.82            | 81.4        |    |
| 387                                                                     | 100       | 386.8             | 100         |    |
| 389                                                                     | 20.5      | 388.79            | 23.2        |    |
| 391                                                                     | 1.9       | 390.83            | 2.3         |    |
|                                                                         |           |                   |             |    |
| Calcd smallest parent mass (exact): 416.797 Da                          |           | Found: 416.777 Da |             | S6 |
| Mass of tallest peak: 418 Da [5.64 min]                                 |           |                   |             |    |
| Formula: C <sub>6</sub> H <sub>8</sub> F <sub>2</sub> S <sub>6</sub> Ag |           |                   |             |    |
| m/z                                                                     | %, calcd. | m/z measured      | %, measured |    |
| 416                                                                     | 82.9      | 416.78            | 79.8        |    |
| 418                                                                     | 100       | 418.77            | 100         |    |
| 420                                                                     | 24.1      | 420.69            | 25.2        |    |
| 422                                                                     | 2.8       | 422.75            | 2.9         |    |
| 424                                                                     | 0.2       | 424.64            | 0.35        |    |
|                                                                         |           |                   |             |    |
| Calcd smallest parent mass (exact): 448.769 Da                          |           | Found: 448.712 Da |             | S7 |
| Mass of tallest peak: 450 Da [6.50 min]                                 |           |                   |             |    |
| Formula: C <sub>6</sub> H <sub>8</sub> F <sub>2</sub> S <sub>7</sub> Ag |           |                   |             |    |
| m/z                                                                     | %, calcd. | m/z measured      | %, measured |    |
| 448                                                                     | 79.8      | 448.71            | 73.8        |    |
| 450                                                                     | 100       | 450.71            | 100         |    |
| 452                                                                     | 27.7      | 452.65            | 29.0        |    |
| 454                                                                     | 3.8       | 454.71            | 4.2         |    |
|                                                                         |           |                   |             |    |
| Calcd smallest parent mass (exact): 480.741 Da                          |           | Found: 480.659    |             | S8 |
| Mass of tallest peak: 482 Da [7.56 min]                                 |           |                   |             |    |
| Formula: C <sub>6</sub> H <sub>8</sub> F <sub>2</sub> S <sub>8</sub> Ag |           |                   |             |    |
| m/z                                                                     | %, calcd. | m/z measured      | %, measured |    |
| 480                                                                     | 77.0      | 480.66            | 73.6        |    |
| 482                                                                     | 100       | 482.64            | 100         |    |

|     |      |        |      |
|-----|------|--------|------|
| 484 | 31.2 | 484.58 | 34.9 |
| 486 | 4.9  | 486.66 | 5.1  |

---

Calcd smallest parent mass (exact): 512.7131 Da    *Found: 512.607 Da*    **S9**

Mass of tallest peak: 514 Da [8.47 min]

Formula: **C<sub>6</sub>H<sub>8</sub>F<sub>2</sub>S<sub>9</sub>Ag**

| <i>m/z</i> | %, calcd. | <i>m/z</i> measured | %, measured |
|------------|-----------|---------------------|-------------|
| 512        | 74.4      | 512.6               | 73.4        |
| 514        | 100       | 514.6               | 100         |
| 516        | 34.6      | 516.5               | 38.4        |
| 518        | 6.2       | 518.5               | 7.4         |

---

Calcd smallest parent mass (exact): 362.682 Da    *Found: 362.689 Da*    **sulfur**

Mass of tallest peak: 364 Da [8.99 min]

Formula: **S<sub>8</sub>Ag**

| <i>m/z</i> | %, calcd. | <i>m/z</i> measured | %, measured |
|------------|-----------|---------------------|-------------|
| 362        | 77.4      | 362.69              | 79.3        |
| 364        | 100       | 364.68              | 100         |
| 366        | 30.7      | 366.68              | 34.9        |
| 368        | 4.7       | 368.7               | 4.6         |

---

Calcd smallest parent mass (exact): 544.685 Da    *Found: 544,547 Da*    **S10**

Mass of tallest peak: 546. Da [9.24 min]

Formula: **C<sub>6</sub>H<sub>8</sub>F<sub>2</sub>S<sub>10</sub>Ag**

| <i>m/z</i> | %, calcd. | <i>m/z</i> measured | %, measured |
|------------|-----------|---------------------|-------------|
| 544        | 71.9      | 544.6               | 75.4        |
| 546        | 100       | 546.6               | 100         |
| 548        | 38.0      | 548.5               | 43.2        |
| 550        | 7.5       | 550.6               | 6.3         |

---

Calcd smallest parent mass (exact): 576.657 Da    *Found: 576.523 Da*    **S11**

Mass of tallest peak: 578. Da [9.99 min]

Formula: **C<sub>6</sub>H<sub>8</sub>F<sub>2</sub>S<sub>11</sub>Ag**

| <i>m/z</i> | %, calcd. | <i>m/z</i> measured | %, measured |
|------------|-----------|---------------------|-------------|
| 576        | 69.6      | 576.5               | 67.7        |
| 578        | 100       | 578.5               | 100         |
| 580        | 41.3      | 580.4               | 44.7        |
| 582        | 9.0       | 582.5               | 7.0         |

---

Calcd smallest parent mass (exact): 608.629 Da    *Found: 608.536 Da*    **S12**

Mass of tallest peak: 610. Da [10.78 min]

Formula: **C<sub>6</sub>H<sub>8</sub>F<sub>2</sub>S<sub>12</sub>Ag**

| <i>m/z</i> | %, calcd. | <i>m/z</i> measured | %, measured |
|------------|-----------|---------------------|-------------|
| 608        | 67.4      | 608.6               | 60.5        |
| 610        | 100       | 610.5               | 100         |

612 44.5 612.5 45.2

---

Calcd smallest parent mass (exact): 640.601 Da *Found: 640.365 Da* **S13**

Mass of tallest peak: 642 Da [11.63 min]

Formula: **C<sub>6</sub>H<sub>8</sub>F<sub>2</sub>S<sub>13</sub>Ag**

| <i>m/z</i> | % calcd. | <i>m/z</i> measured | %, measured |
|------------|----------|---------------------|-------------|
| 640        | 65.330   | 640.4               | 62.0        |
| 642        | 100      | 642.4               | 100         |
| 644        | 47.7     | 644.4               | 48.8        |
| 646        | 12.3     | 646.3               | 9.3         |

---

Calcd smallest parent mass (exact): 672.574 Da *Found: 672.385 Da* **S14**

Mass of tallest peak: 674 Da [12.75 min]

Formula: **C<sub>6</sub>H<sub>8</sub>F<sub>2</sub>S<sub>14</sub>Ag**

| <i>m/z</i> | % calcd. | <i>m/z</i> measured | %, measured |
|------------|----------|---------------------|-------------|
| 672        | 63.4     | 672.4               | 67.8        |
| 674        | 100      | 674.4               | 100         |
| 676        | 50.8     | 676.3               | 47.0        |

---

Calcd smallest parent mass (exact): 704.546 Da *Found: 704.310 Da* **S15**

Mass of tallest peak: 706 Da [14.48 min]

Formula: **C<sub>6</sub>H<sub>8</sub>F<sub>2</sub>S<sub>15</sub>Ag**

| <i>m/z</i> | % calcd. | <i>m/z</i> measured | %, measured |
|------------|----------|---------------------|-------------|
| 704        | 61.6     | 704.3               | 51.2        |
| 706        | 100      | 706.3               | 100         |
| 708        | 53.9     | 708.3               | 60.2        |

---

<sup>1</sup>H NMR spectra  
S-(2-Fluoroallyl) ethanethioate (11)

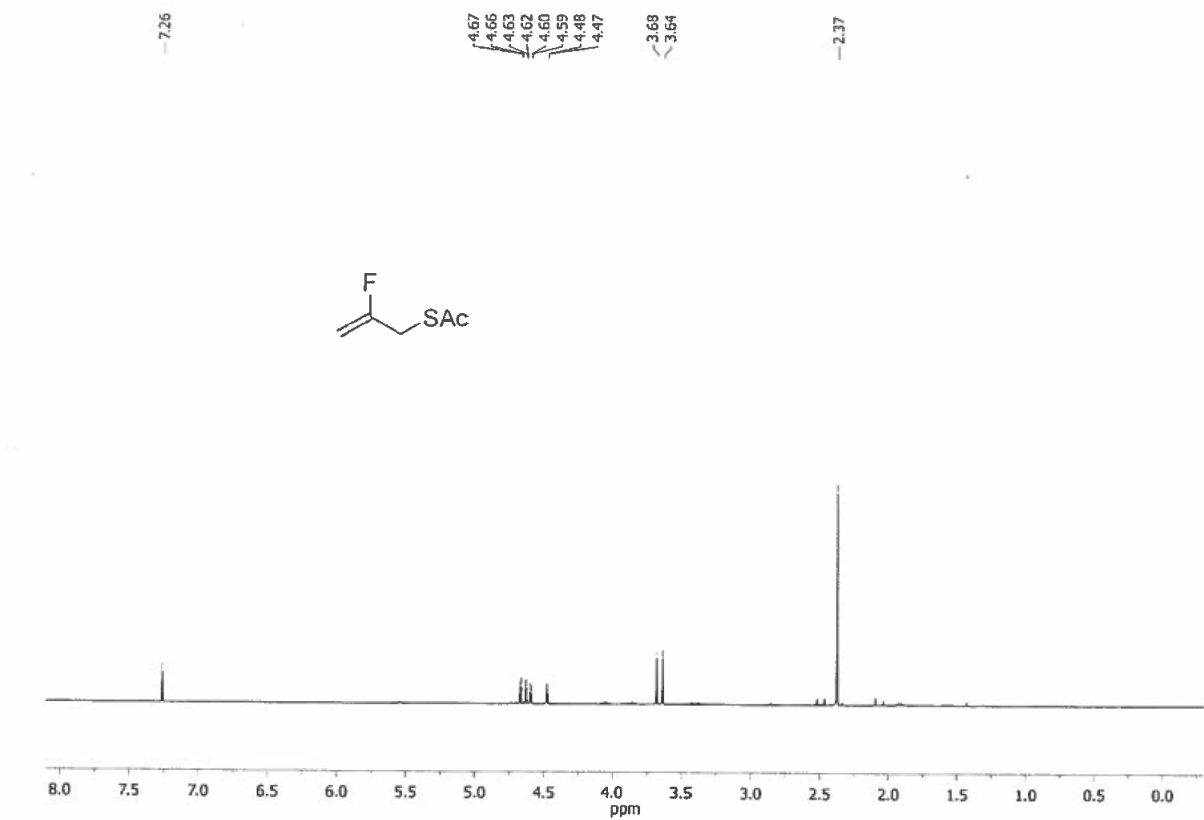

2-F Allyl SAc 12-7-07 1 1 /opt/topspin Wang

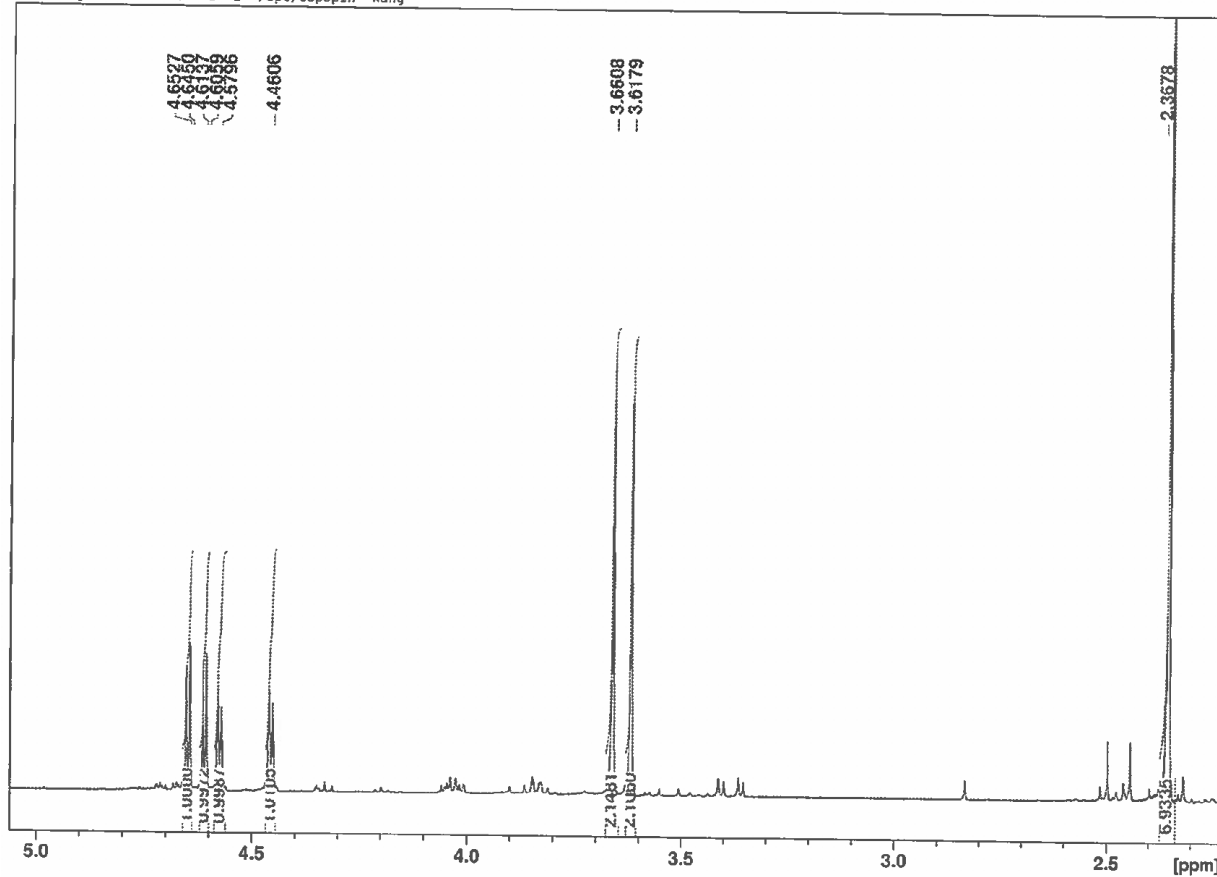

## 1,2-Bis(2-fluoroallyl)disulfane (12)

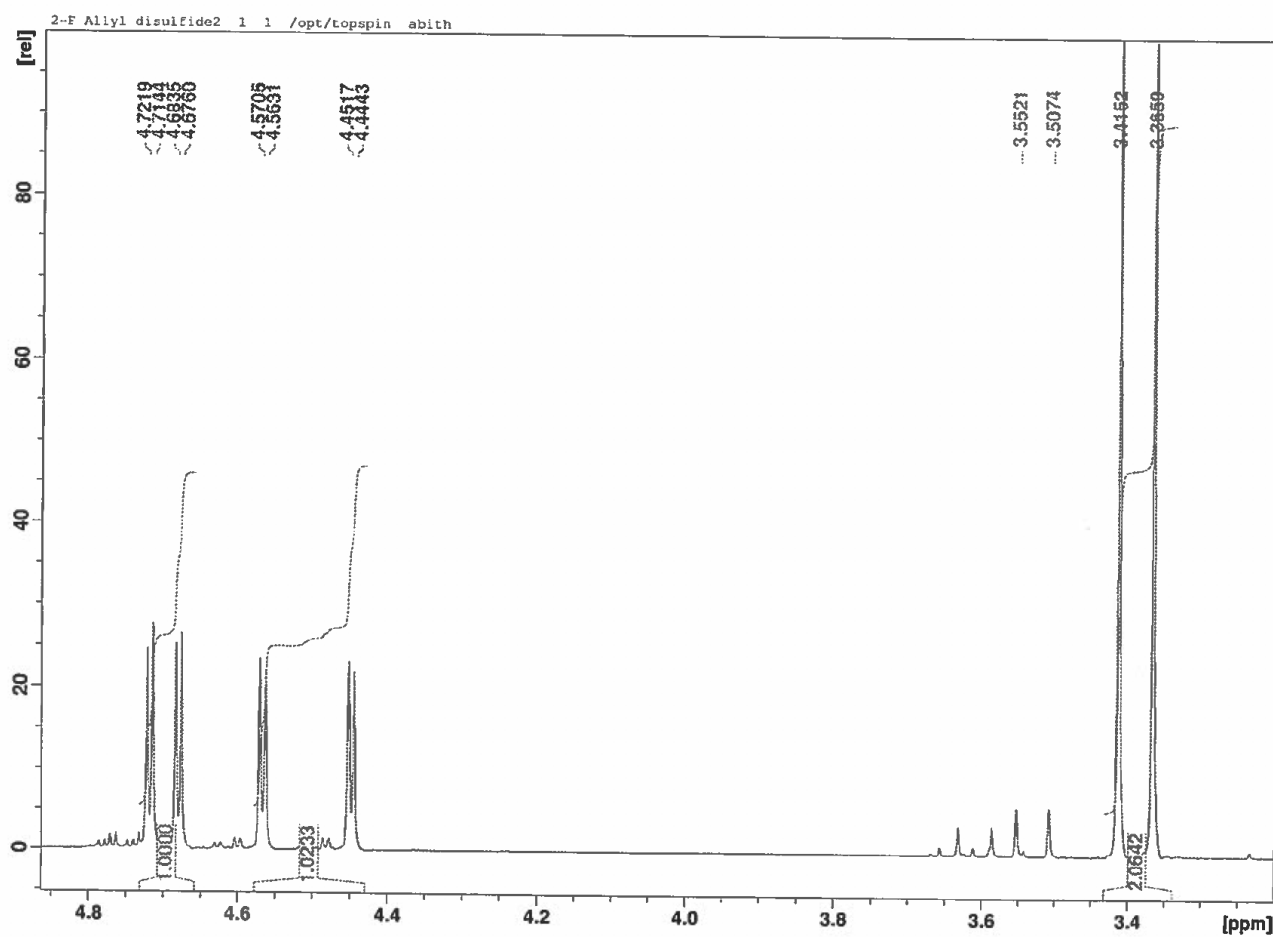



## S-2 -Fluoro-2-propenyl-L-cysteine (13)

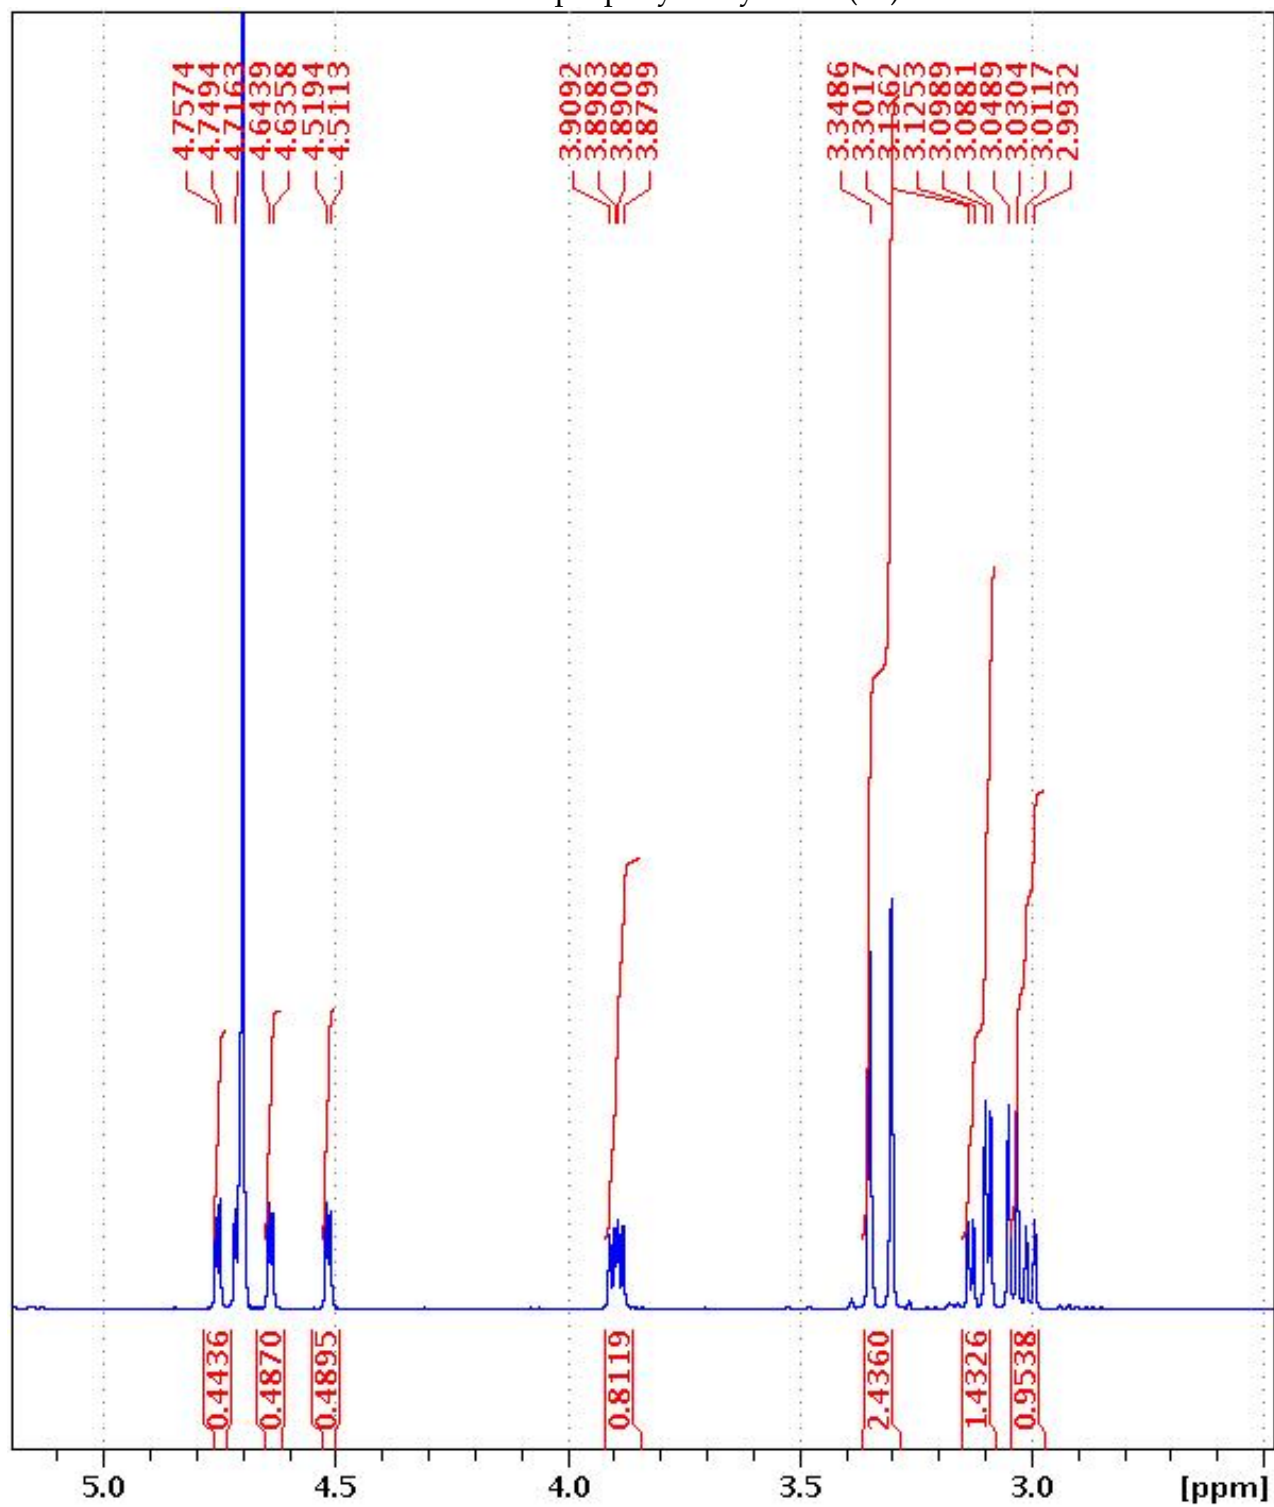

$^{13}\text{C}$  NMR Spectra

Difluoroallicin (9; S-(2-Fluoroallyl) 2-fluoroprop-2-ene-1-sulfinothioate)

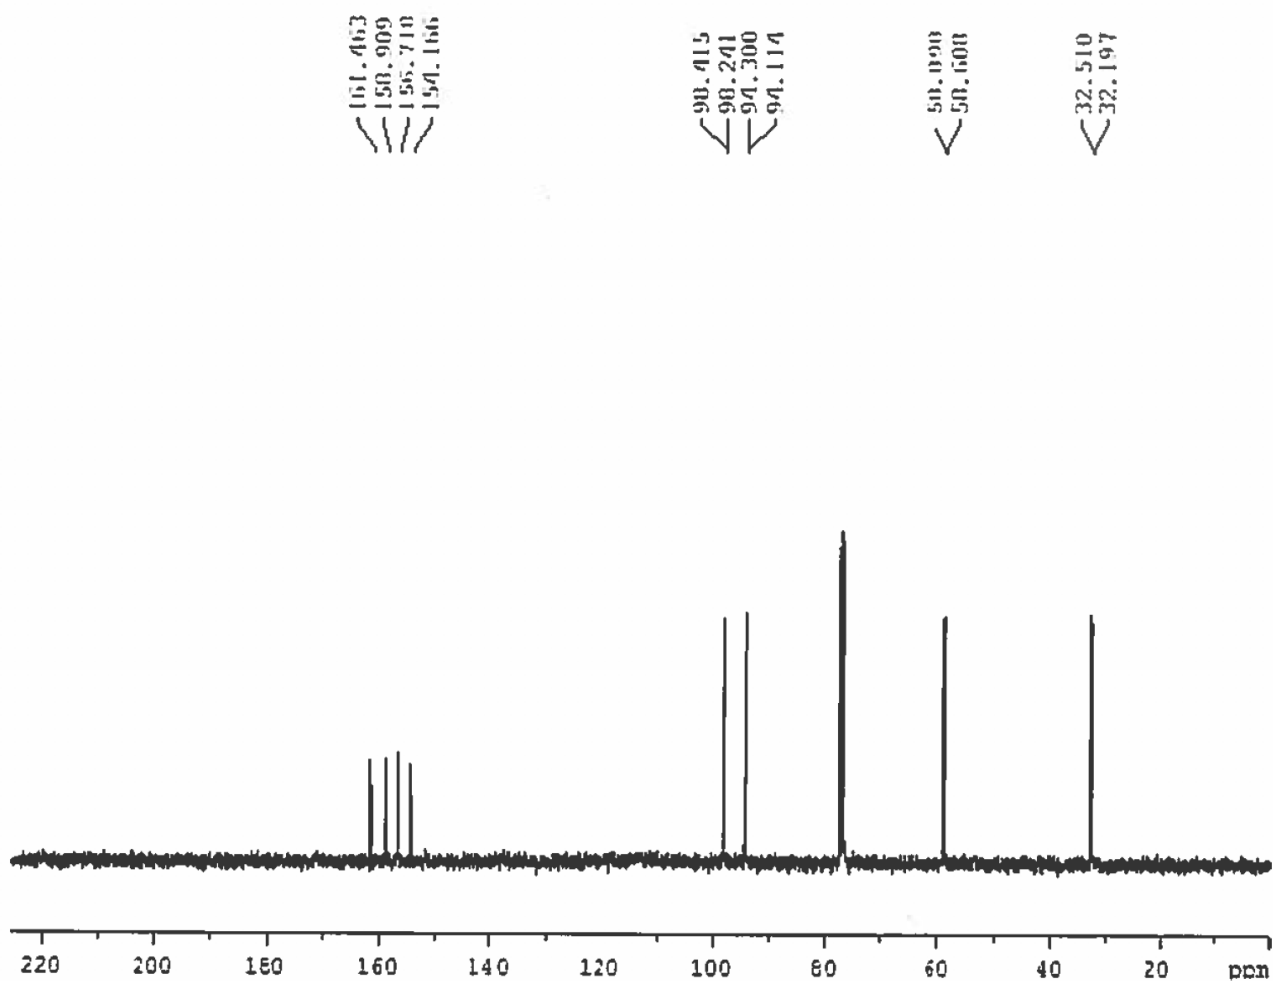

## S-(2-Fluoroallyl) ethanethioate (11)

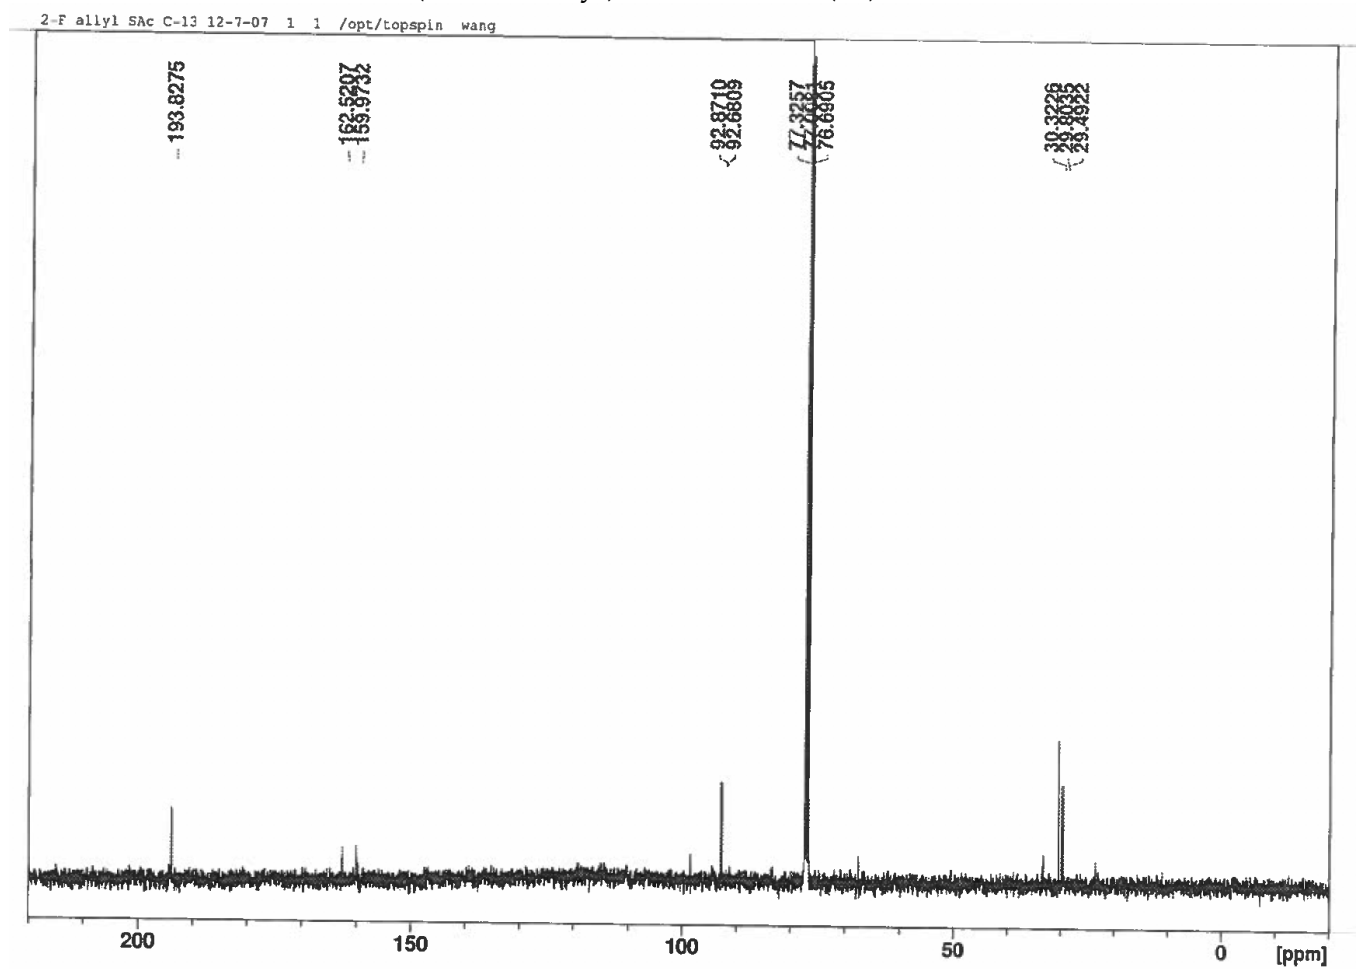

## 1,2-Bis(2-fluoroallyl)disulfane (12)

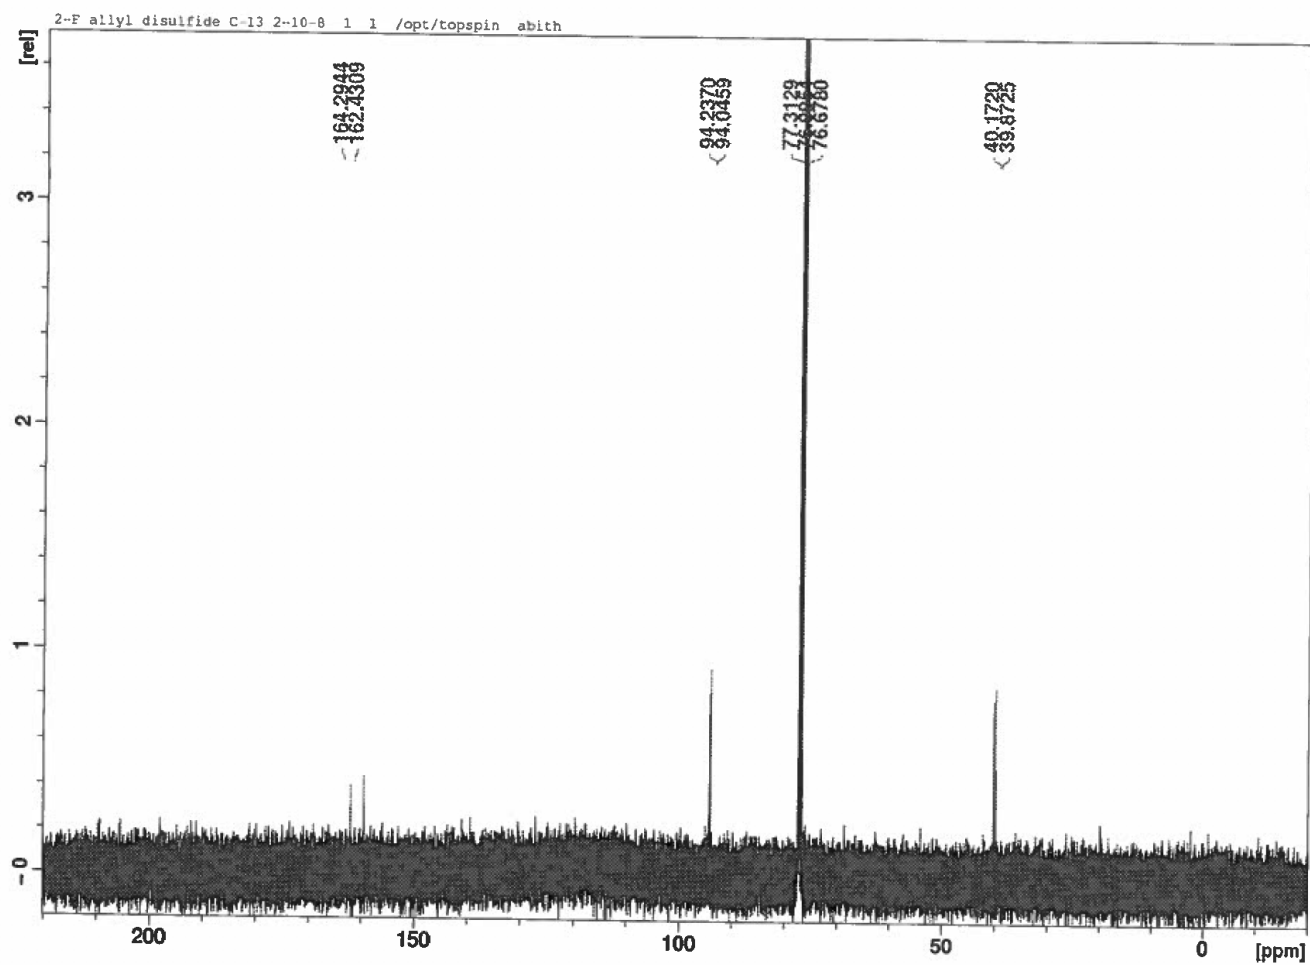

## S-2 -Fluoro-2-propenyl-L-cysteine (13)

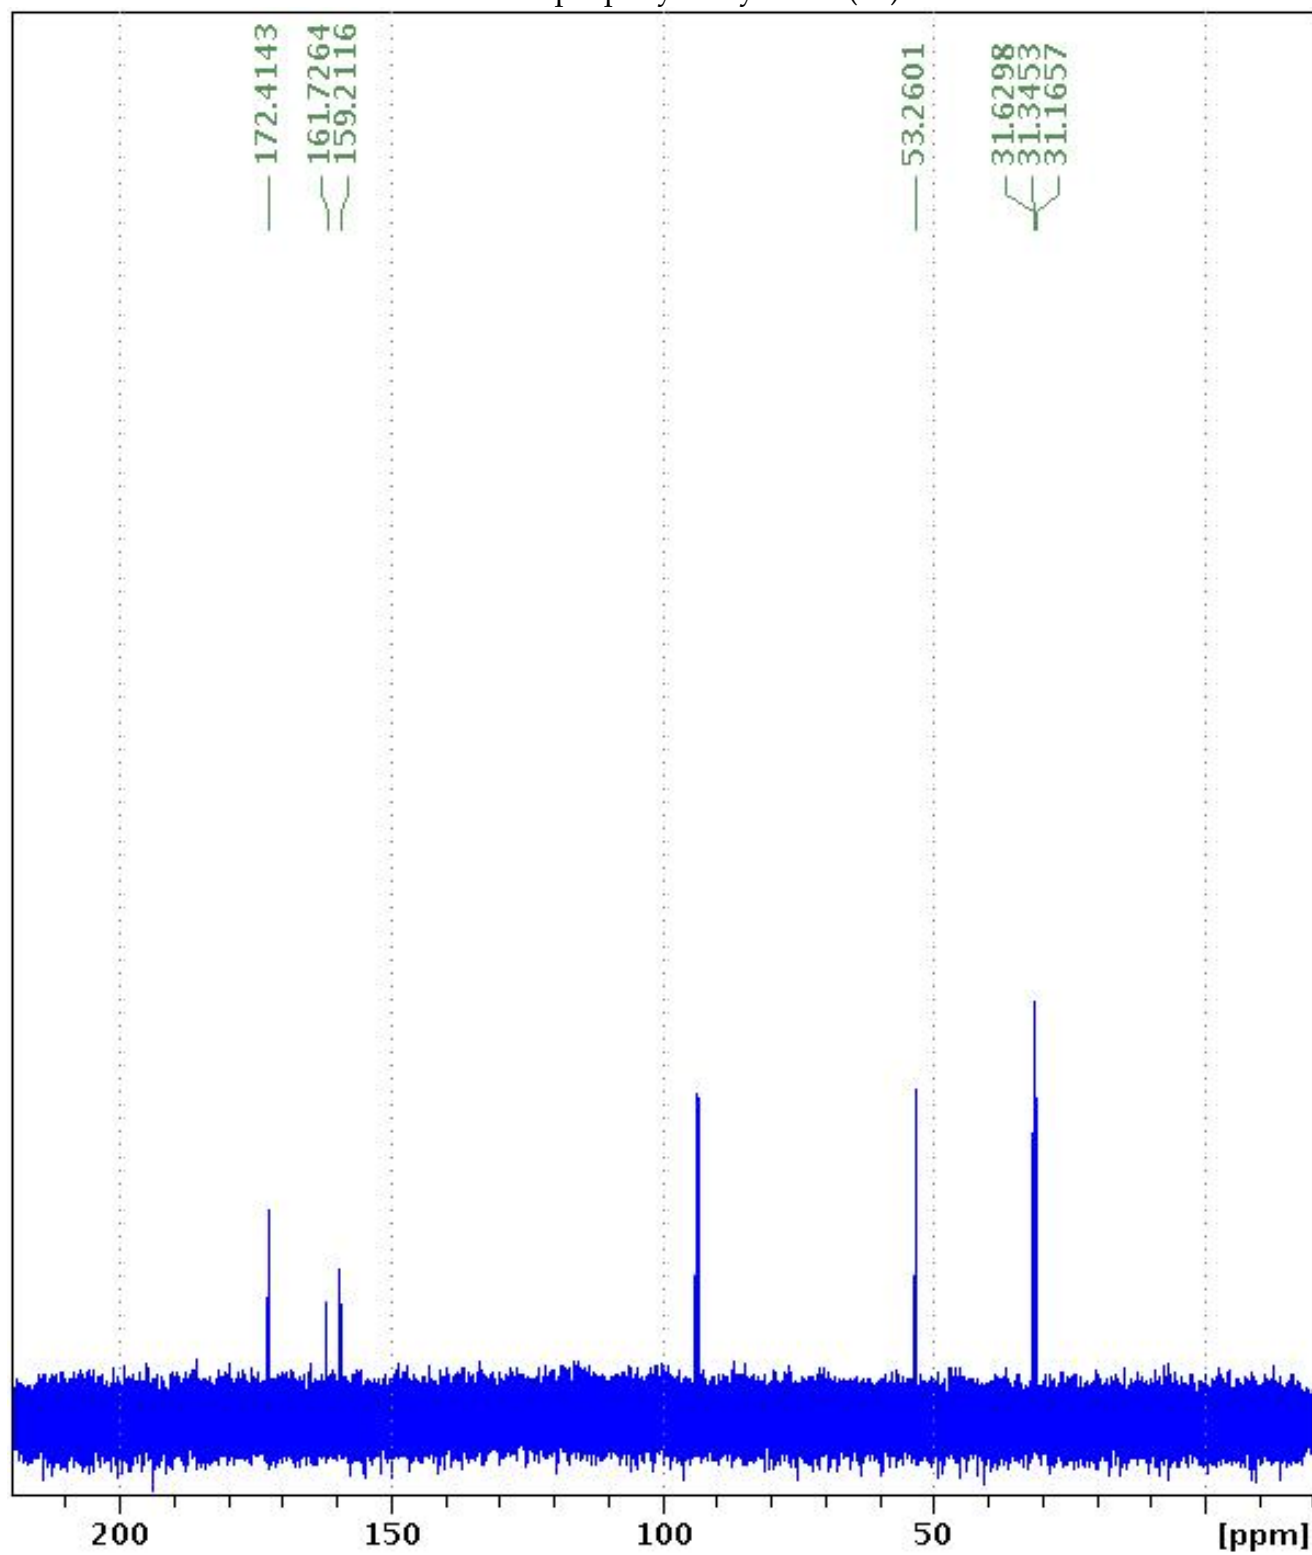

**$^{19}\text{F}$  NMR Spectra**

Difluoroallicin (9; S-(2-Fluoroallyl) 2-fluoroprop-2-ene-1-sulfinothioate)

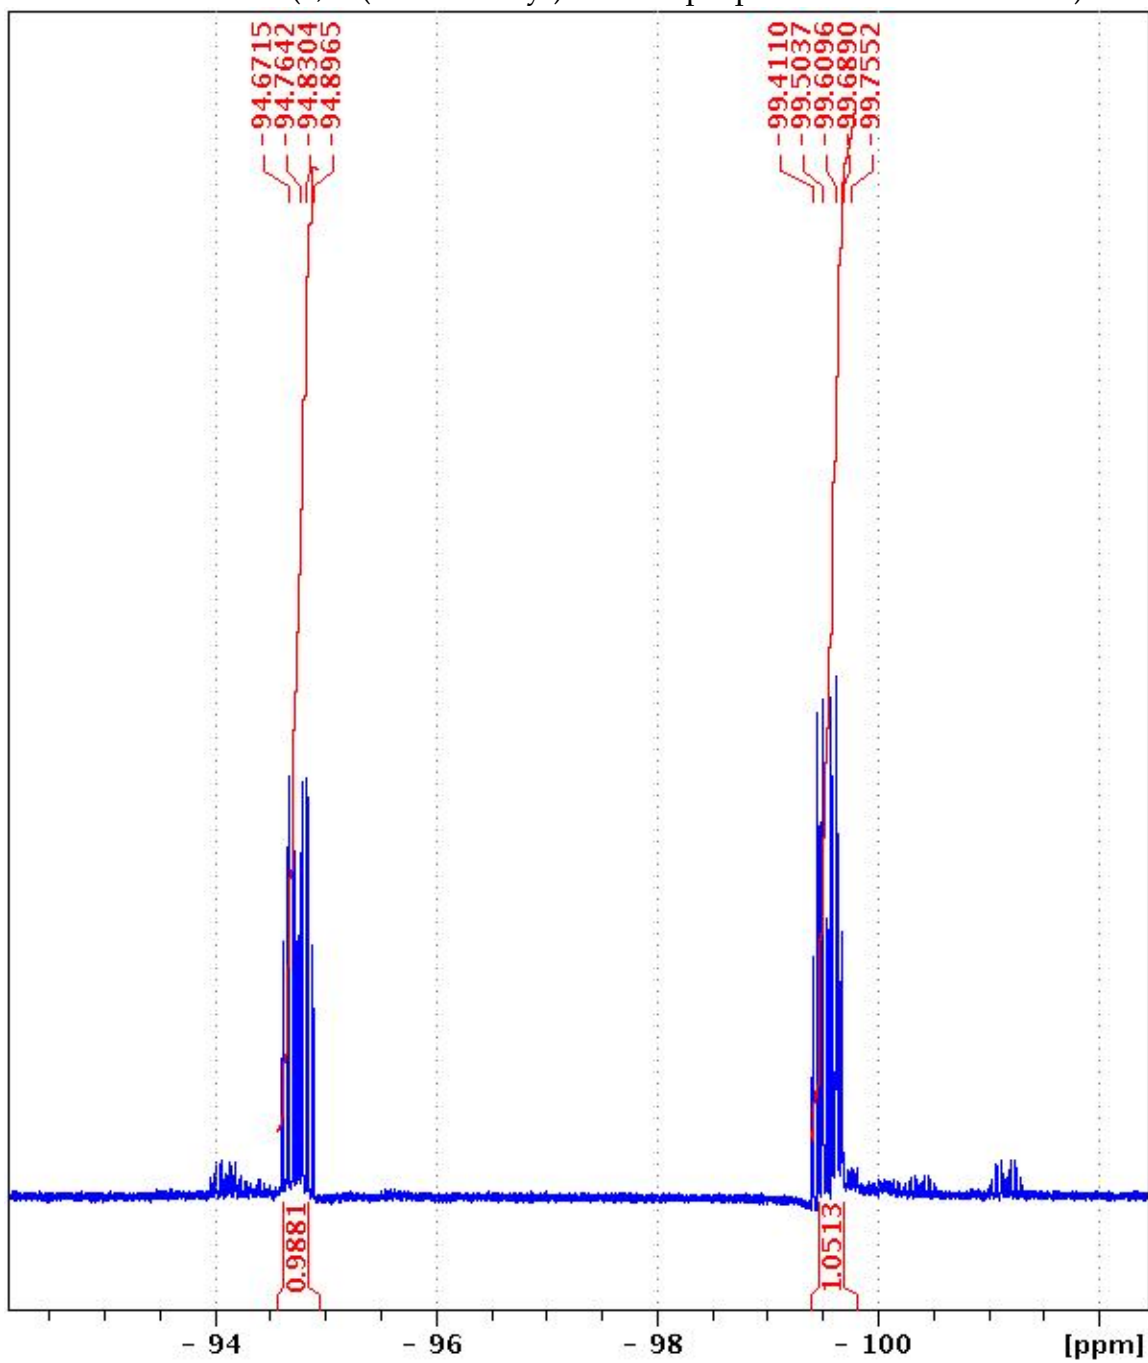

S-(2-Fluoroallyl) ethanethioate (**11**)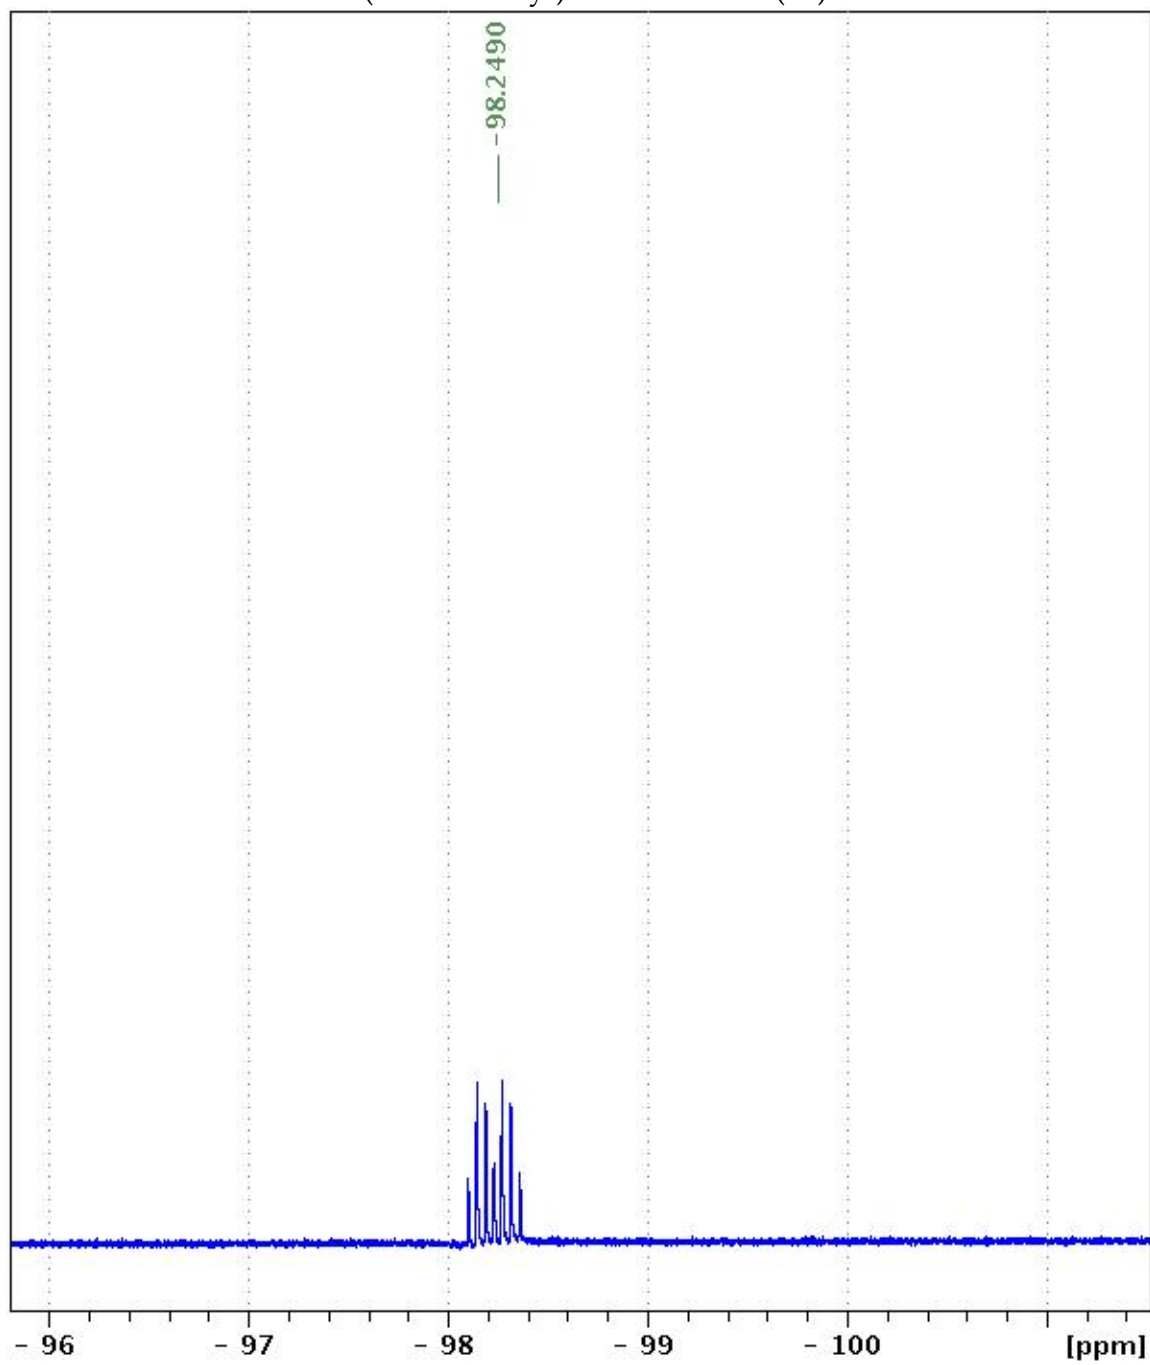

## 1,2-Bis(2-fluoroallyl)disulfane (12)

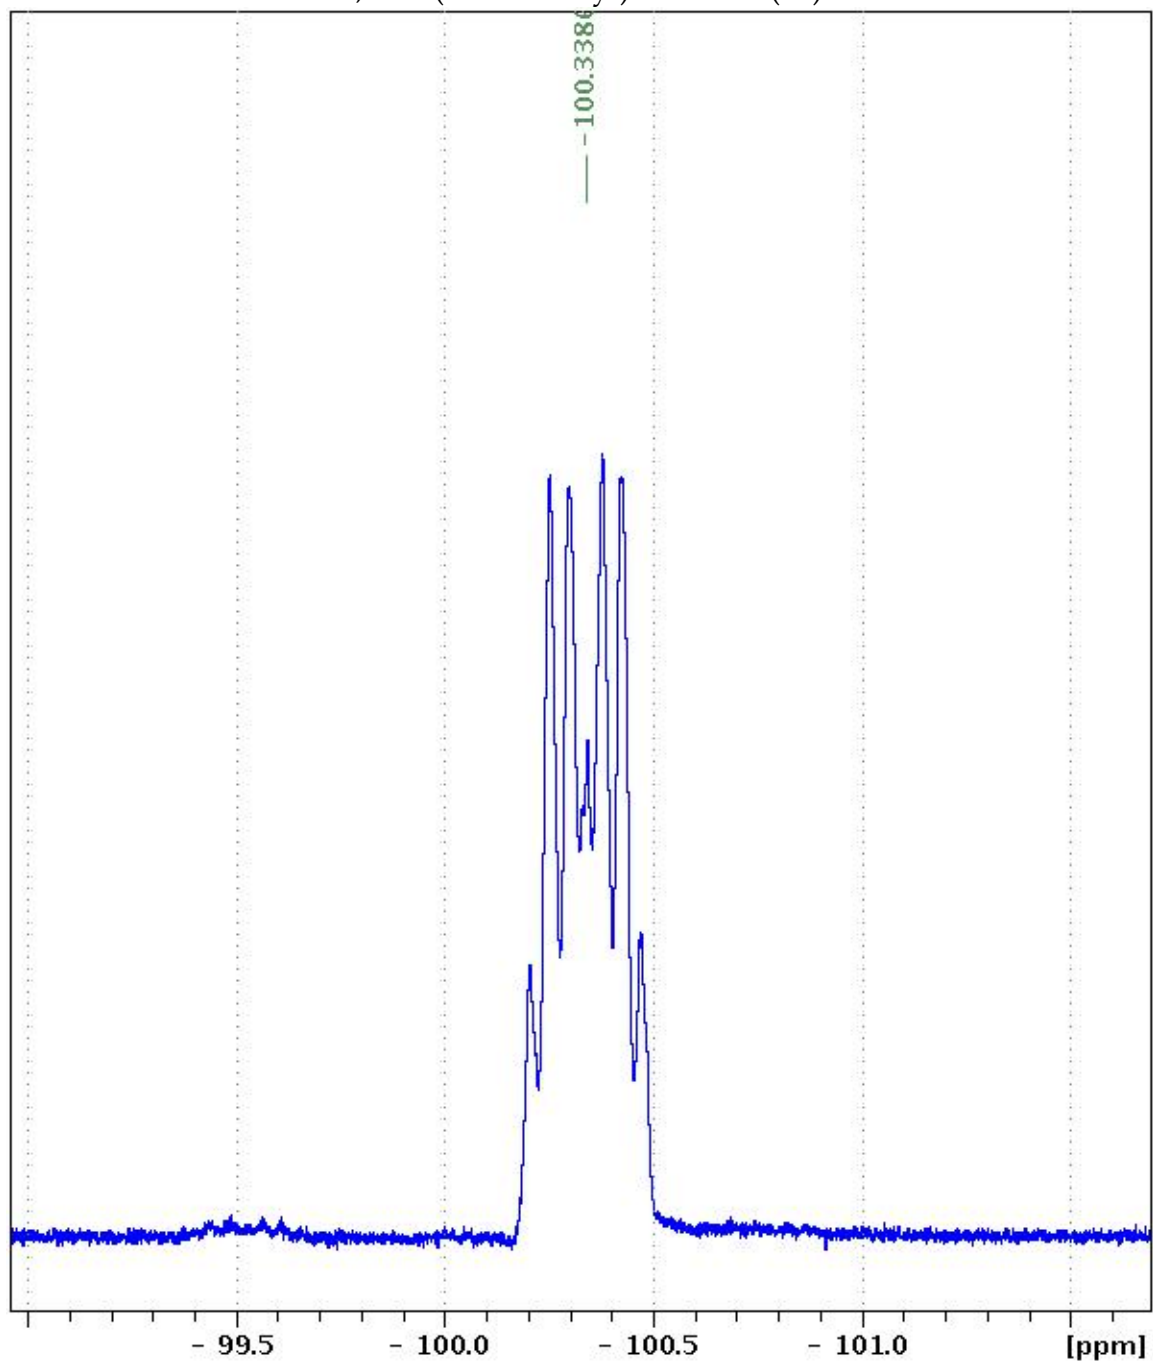



Mixture of difluoroallicin, **9**, and trifluoroajoene, **16**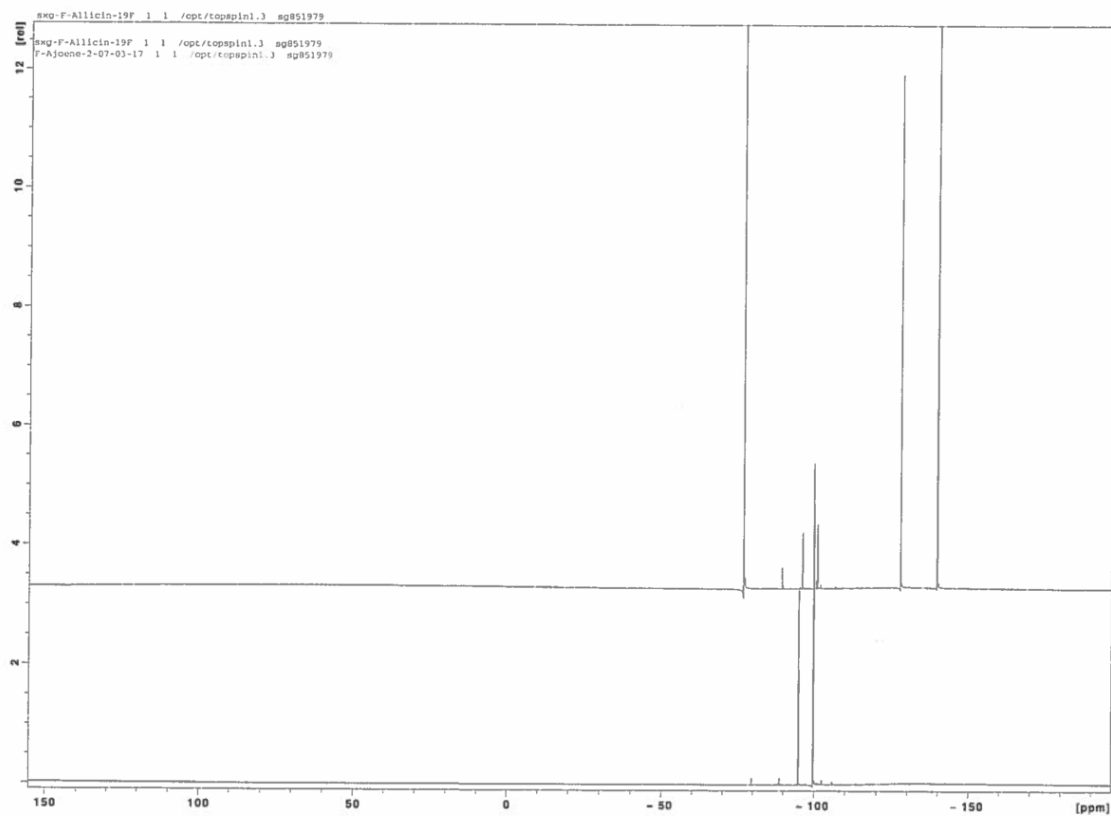

## S-2 -Fluoro-2-propenyl-L-cysteine (13)

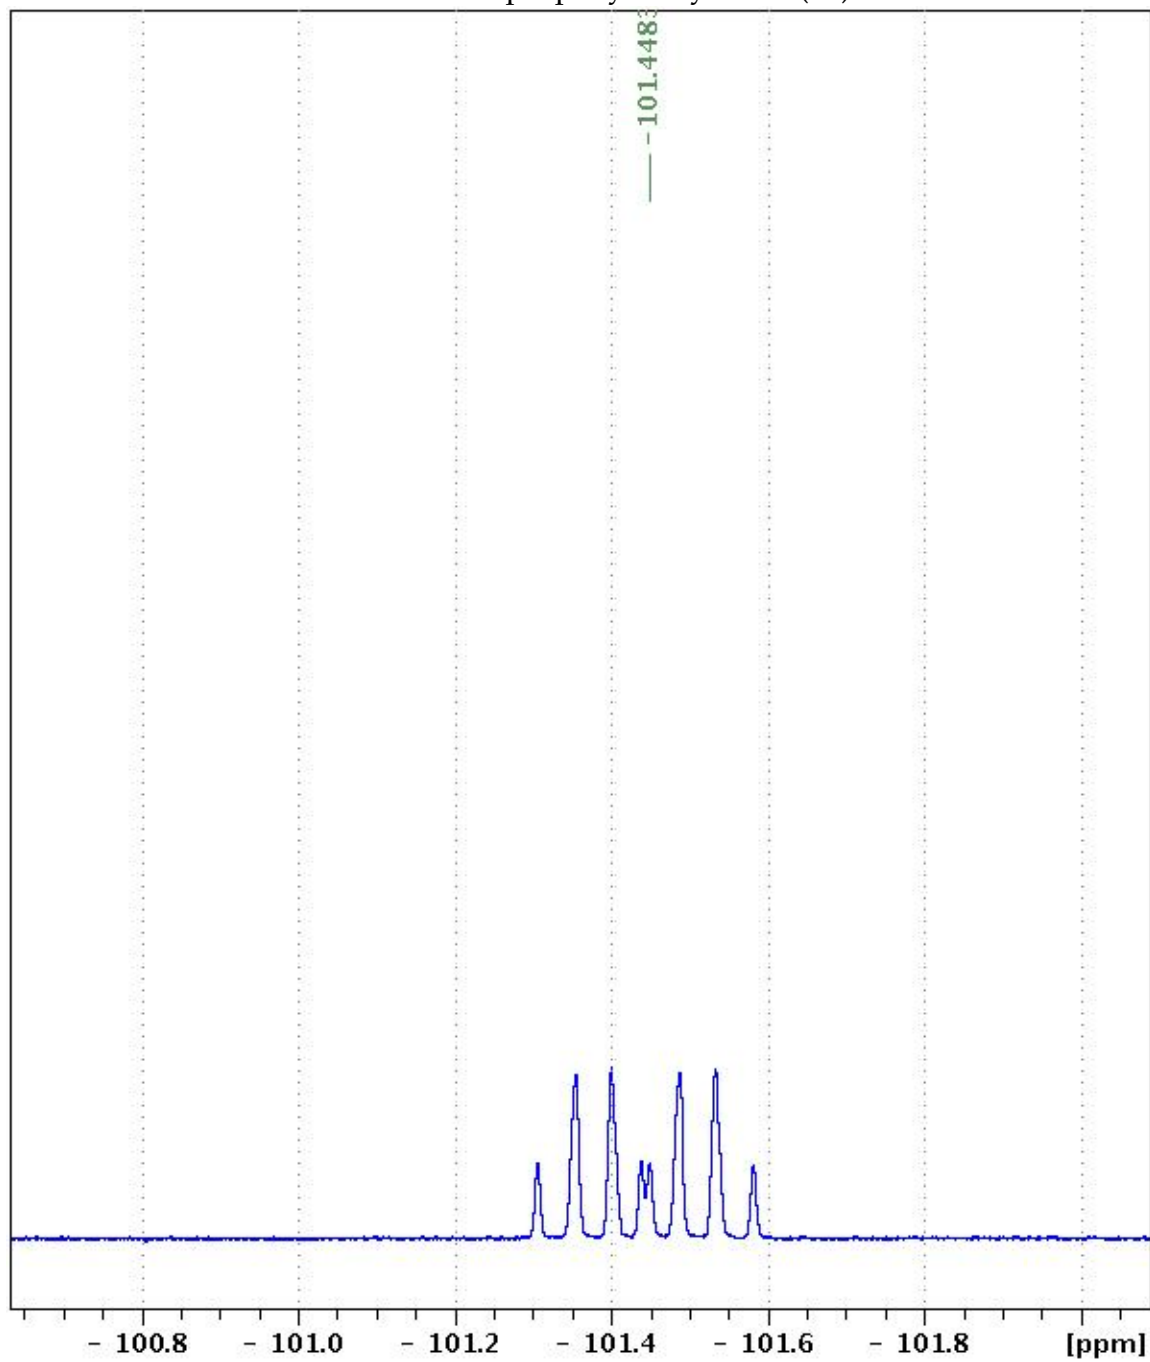

(+)-S-2-Fluoro-2-propenyl-L-cysteine S-oxide (22)

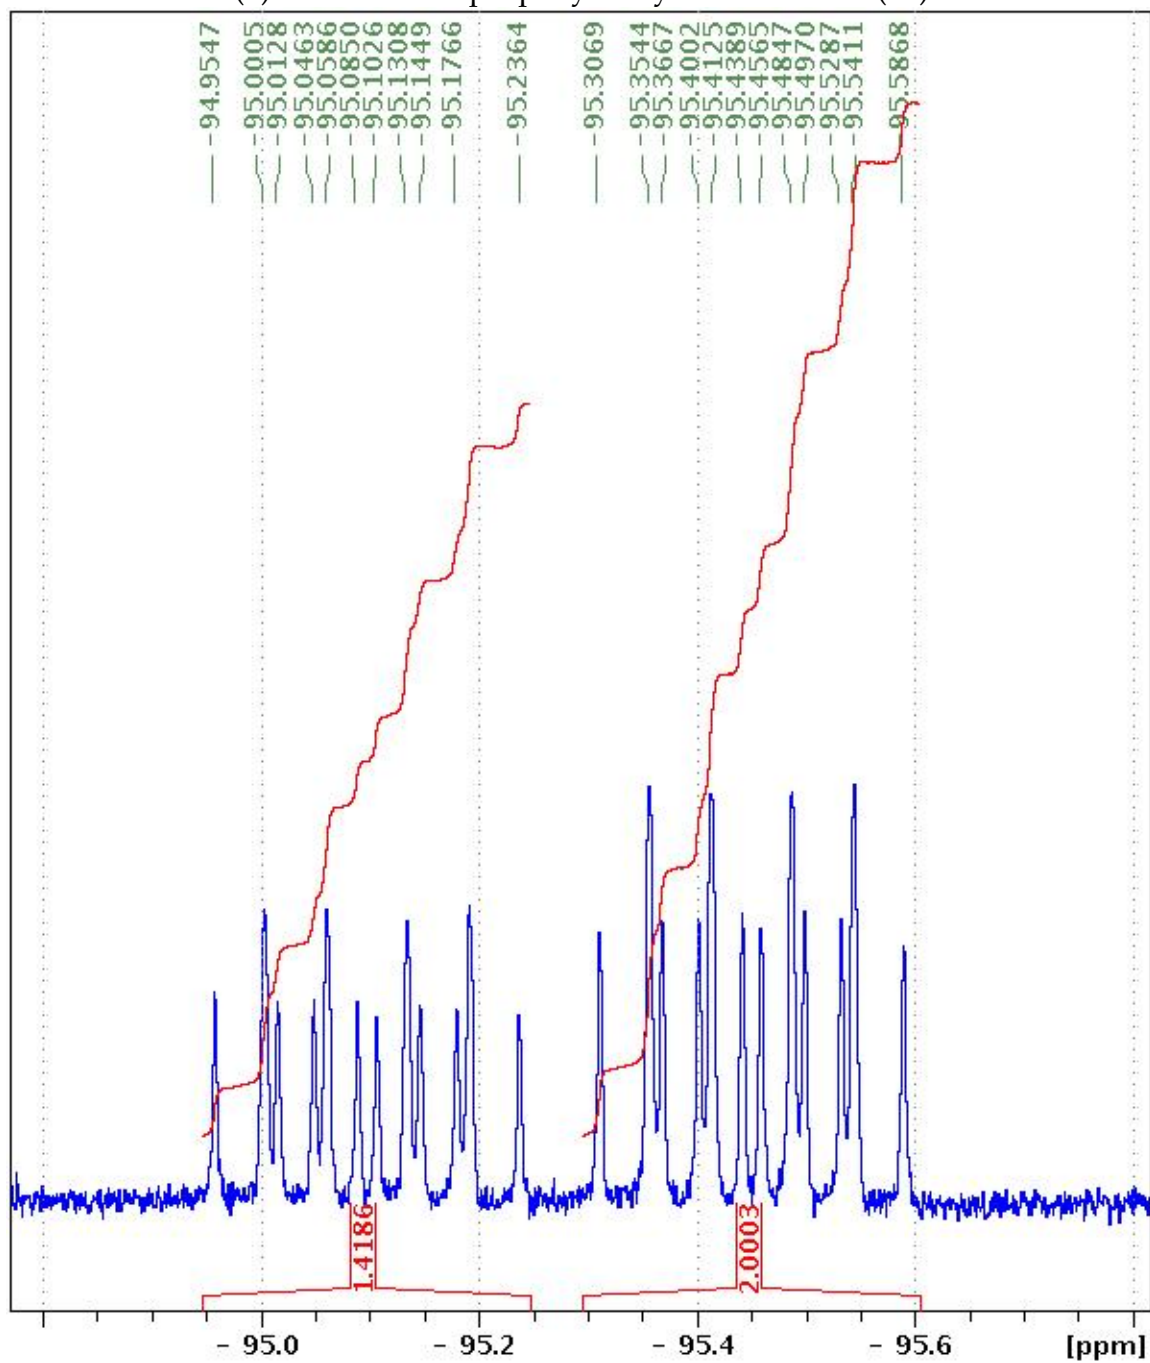

## DART Mass Spectra

DART MS of fluoroalliin with powdered garlic showing alliin, monofluoroallicin and difluoroallicin  
 $[C_6H_9O_1F_2S_2 (M+H) - \text{difluoroallicin Calc. } m/z \text{ } 199.0063 \text{ Found } 199.0098; C_6H_{10}O_1F_1S_2 (M+H) - \text{monofluoroallicin? Calc. } m/z \text{ } 181.0157 \text{ Found } 181.0169]$

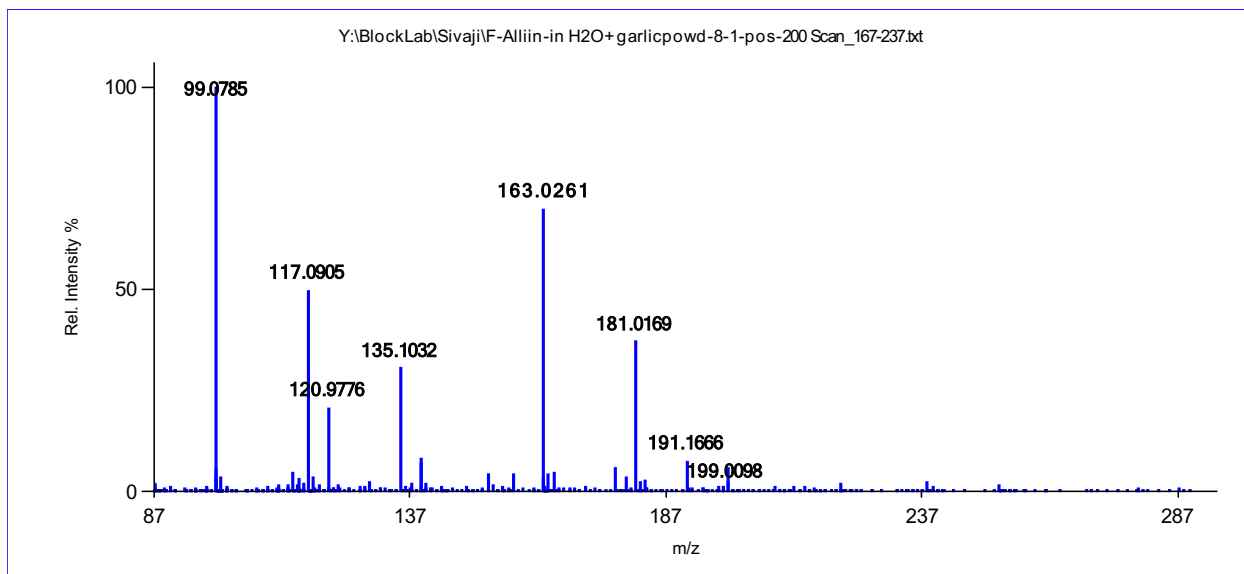

## Mixture of difluoroallicin and trifluoroajoene

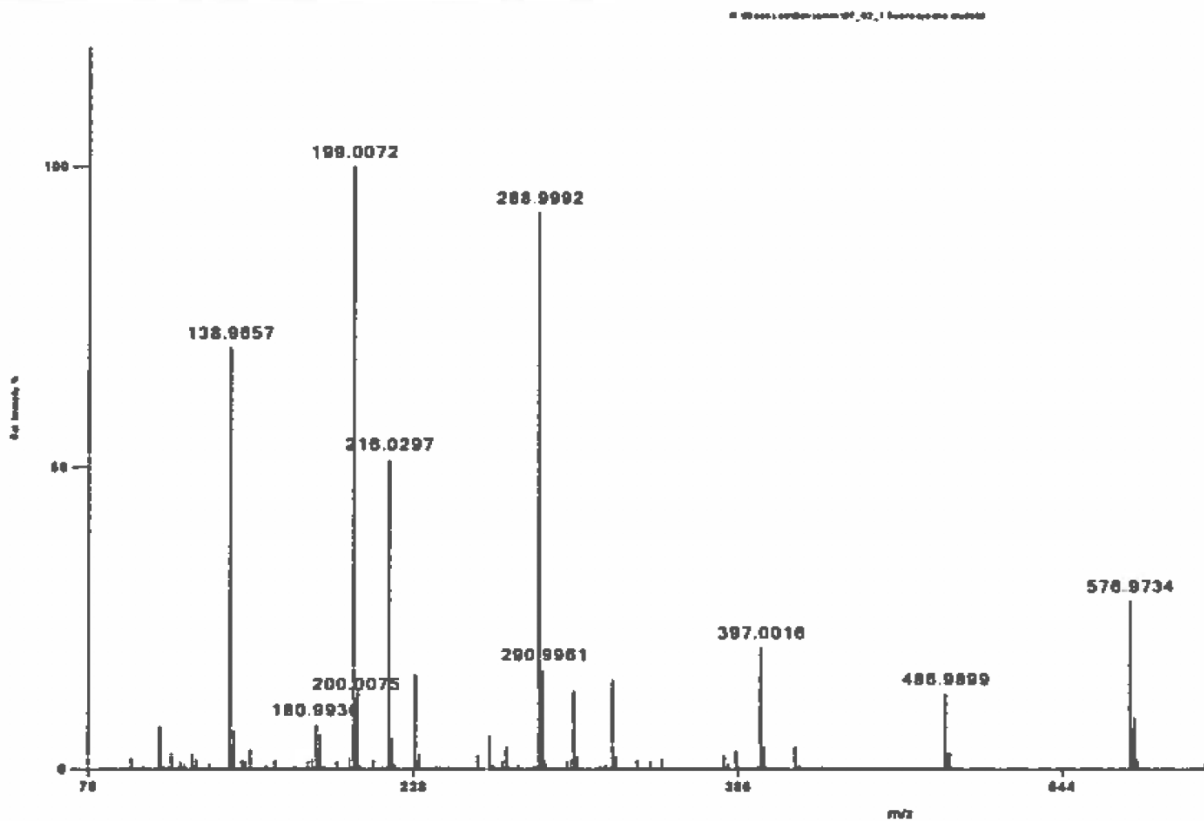

Supplement: s1 [file s1]
